# Supplementary material
Source: PubMed Central journal article supplement (PMC3959641)

## **Supplemental figure legends**

### **Figure S1. Methionine 142 of human MAVS is conserved among primates and other higher mammals**

Related to Figure 1

Figure S1 shows an alignment of the region surrounding methionine 142 of human MAVS to several other species. Methionine 142 is highlighted in bold and conserved amino acids are highlighted with an asterisk.

### **Figure S2. miniMAVS inhibits FL MAVS-dependent interferon production over time and interacts with TRAF6**

Related to Figure 4

Figure S2 A shows the level of FL and miniMAVS in 293T cells following SeV infection. Figure S2B and C demonstrate the MAVS dependent antiviral response by STAT1 phosphorylation following transient expression of several MAVS constructs. Cell lysates were probed for pSTAT1, actin, and MAVS. Figure S2D shows FL MAVS oligomerization following SeV infection. Crude mitochondrial extracts were separated by sucrose gradient centrifugation and probed for MAVS. Figure S2E shows co-immunoprecipitation of TRAF6 and miniMAVS. HA-TRAF6 and 3xFlag-miniMAVS were expressed in 293T cells and isolated with Flag specific affinity gel.

### **Figure S3. Ribosomal profiling identifies truncation variants of antiviral genes**

Related to Figure 6

Figure S3 shows the pattern of ribosome initiation and elongation for several transcripts involved in antiviral immunity; IFIH1 (MDA5) (A), MX2 (B), IFITM2 (C), TRIM25 (D), DDX58 (RIG-I) (E), TMEM173 (STING) (F). The reading frames detected by harringtonine treatment are shown below each profile. Canonical reading frames are in grey, truncations in green, uORFs in red, internal out-of-frames in orange. These data highlight the idea that polycistronic messages may be more prevalent than previously appreciated.

### **Table S1. Start sites within the MAVS transcript vary in strength**

Related to Figure 3

Table S1 lists the start sites at each ORF on the MAVS transcript. The strength of each start site was determined by adherence to the Kozak consensus sequence. Start sites with a purine at position -3 and a guanine at position +4 are considered

strong. Start sites with one of the above properties are considered medium, and those lacking both are considered weak.

**Table S2. Genome-wide ribosomal profiling identifies active start sites**

Related to Figure 6

Table S2 is a list of all the start sites that were identified in our ribosomal profiling study. The table includes transcript ID, start site location, and the classification of the predicted product.

**Supplemental Procedures**

None.

**Supplemental References**

None

Figure S1

A

|            |                                |     |
|------------|--------------------------------|-----|
|            | <b>M 142</b>                   |     |
|            | ▼                              |     |
| Human      | SCREKEPSYP <b>M</b> PVQETQAPES | 152 |
| Chimpanzee | SCREKEPSYP <b>M</b> PVQETQVPES | 152 |
| Gorilla    | SCREKEPSYP <b>M</b> PVQETHAPES | 151 |
| Macaque    | GYREKEPSYP <b>M</b> PVQETQAPDS | 152 |
| Panda      | GYREEEPSFP <b>M</b> PVQDTQPPES | 153 |
| Horse      | GYRGEEPSYP <b>M</b> PVQDTRPPEP | 152 |
| Pig        | GYREDEPSYP <b>M</b> PVQDTQSPEA | 152 |
| Dolphin    | GYREDEPSYP <b>M</b> PVQDTQSPES | 152 |
| Ferret     | GYREEEPSFP <b>L</b> PVQDTQPAES | 153 |
| Mouse      | GLRE-TPSCP <b>K</b> PVQDTQPPES | 152 |
| Rat        | GFQD-KPGYP <b>K</b> PVQDTQPPKS | 152 |
| Guinea     | GYRE-EPSYP <b>R</b> PVQDTQPPMS | 152 |
| Squirrel   | GYRE-DPSYP <b>R</b> PVQDTQPPKS | 151 |
|            | * * *** *                      |     |

Figure S2

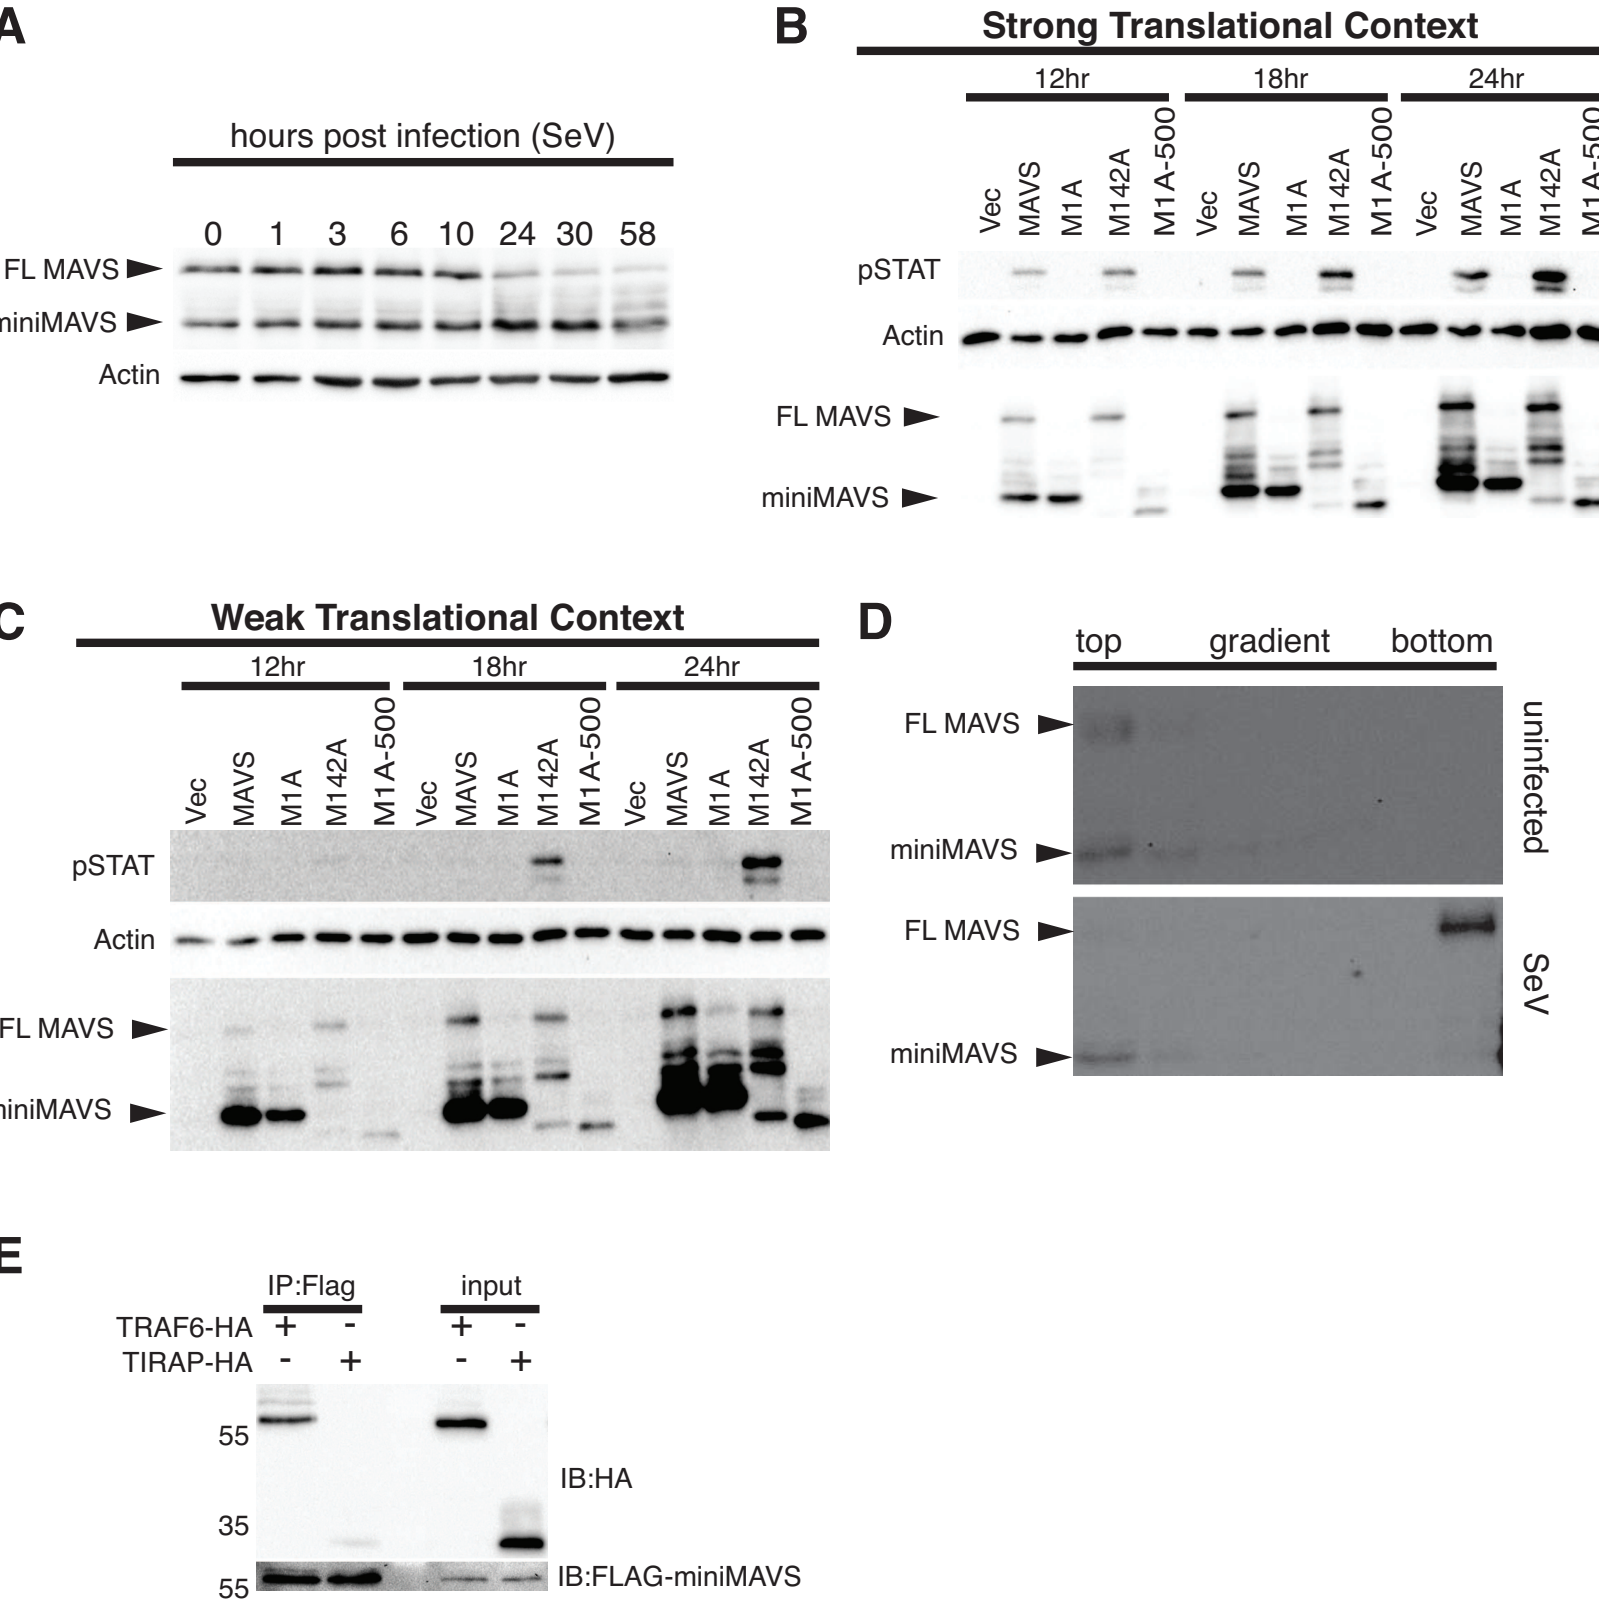

Figure S3

**A**

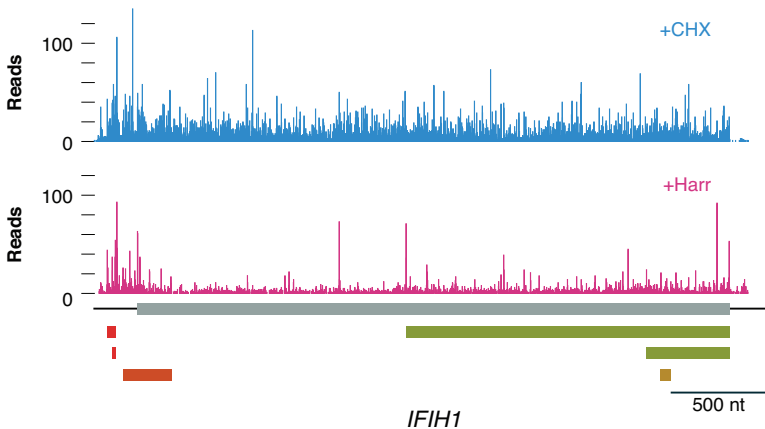

**B**

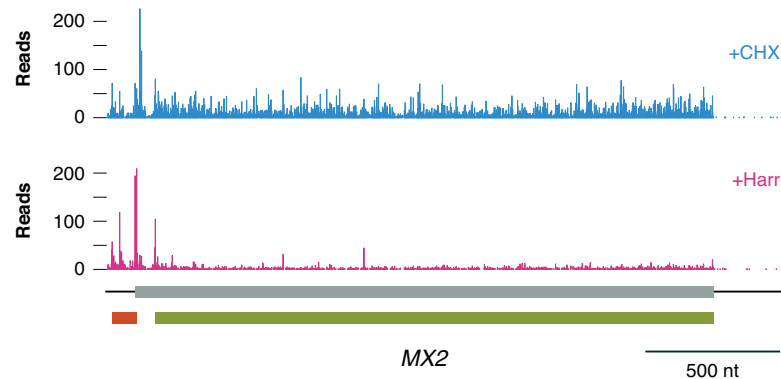

**C**

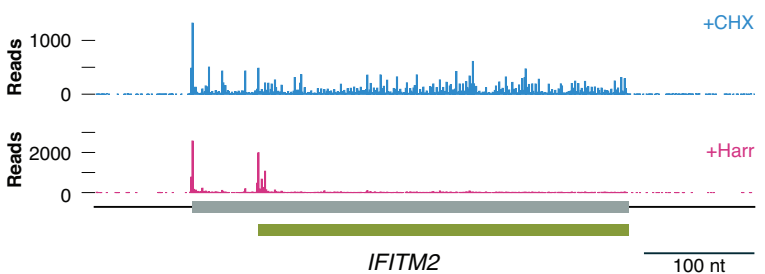

**D**

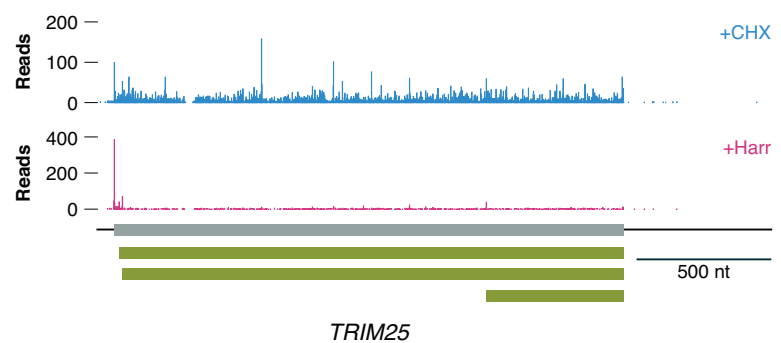

**E**

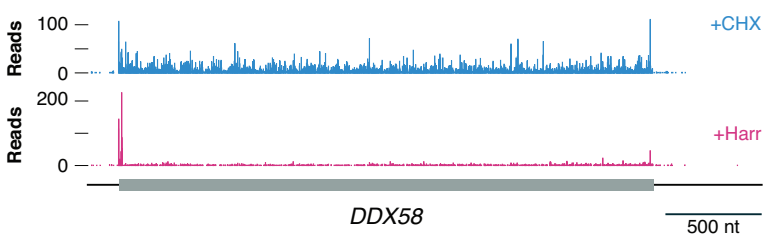

**F**

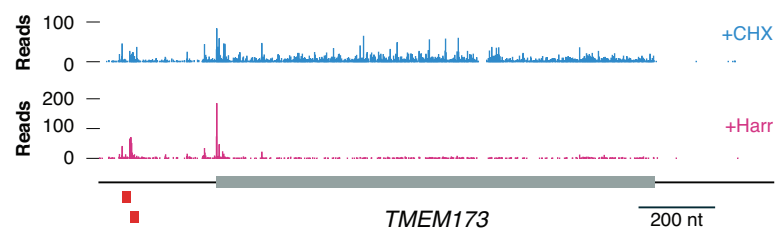

Supplement: NIHMS558181-supplement-01.pdf [file NIHMS558181-supplement-01.pdf]
